# Supplementary material for: A Mathematical Model of Cancer Stem Cell Driven Tumor Initiation: Implications of Niche Size and Loss of Homeostatic Regulatory Mechanisms
Source: PubMed Central journal article supplement (PMC3747196; doi:10.1371/journal.pone.0071128), 2013-08-19
Supplement: pone.0071128.s001.pdf [file pone.0071128.s001.pdf]

Table S1: Increased Stem Cell Proliferation Parameters

| Parameter     | GRD       |           | DGR       |           | RDG       |           |
|---------------|-----------|-----------|-----------|-----------|-----------|-----------|
|               | AM        | LM        | AM        | LM        | AM        | LM        |
| $m_0$         | $10^{-6}$ | $10^{-6}$ | $10^{-6}$ | $10^{-6}$ | $10^{-6}$ | $10^{-6}$ |
| $k_0$         | 0.035     | 0.035     | 0.035     | 0.035     | 0.035     | 0.035     |
| $\delta_{S0}$ | 0.05      | 0.05      | 0.05      | 0.05      | 0.05      | 0.05      |
| $\delta_{N0}$ | 2.4       | 2.4       | 2.4       | 2.4       | 2.4       | 2.4       |
| $m_1$         | $10^{-4}$ | $10^{-4}$ | $10^{-6}$ | $10^{-6}$ | $10^{-6}$ | $10^{-6}$ |
| $k_1$         | 0.035     | 0.035     | 0.035     | 0.035     | 0.07      | 0.07      |
| $\delta_{S1}$ | 0.05      | 0.95      | 0.025     | 0.025     | 0.05      | 0.95      |
| $\delta_{N1}$ | 2.4       | 2.4       | 1.2       | 1.2       | 2.4       | 2.4       |
| $m_2$         | $10^{-4}$ | $10^{-4}$ | $10^{-4}$ | $10^{-4}$ | $10^{-6}$ | $10^{-6}$ |
| $k_2$         | 0.07      | 0.07      | 0.035     | 0.035     | 0.07      | 0.07      |
| $\delta_{S2}$ | 0.05      | 0.95      | 0.025     | 0.025     | 0.025     | 0.025     |
| $\delta_{N2}$ | 2.4       | 2.4       | 2.4       | 2.4       | 1.2       | 1.2       |
| $k_3$         | 0.07      | 0.07      | 0.07      | 0.07      | 0.07      | 0.07      |
| $\delta_{S3}$ | 0.025     | 0.025     | 0.025     | 0.025     | 0.025     | 0.025     |
| $\delta_{N3}$ | 1.2       | 1.2       | 1.2       | 1.2       | 1.2       | 1.2       |

AM = Advantageous Mutations, LM = Lethal Mutations
