# Supplementary material for: A Mathematical Model of Cancer Stem Cell Driven Tumor Initiation: Implications of Niche Size and Loss of Homeostatic Regulatory Mechanisms
Source: PubMed Central journal article supplement (PMC3747196; doi:10.1371/journal.pone.0071128), 2013-08-19
Supplement: pone.0071128.s002.pdf [file pone.0071128.s002.pdf]

Table S2: Unbalanced Stem Cell Division Parameters

| Parameter     | GRD                |                    | DGR                |                    | RDG                |                    |
|---------------|--------------------|--------------------|--------------------|--------------------|--------------------|--------------------|
|               | AM                 | LM                 | AM                 | LM                 | AM                 | LM                 |
| $m_0$         | $10^{-6}$          | $10^{-6}$          | $10^{-6}$          | $10^{-6}$          | $10^{-6}$          | $10^{-6}$          |
| $\theta_{S0}$ | $1.96 \times 10^4$ | $1.96 \times 10^4$ | $1.96 \times 10^4$ | $1.96 \times 10^4$ | $1.96 \times 10^4$ | $1.96 \times 10^4$ |
| $\delta_{S0}$ | 0.05               | 0.05               | 0.05               | 0.05               | 0.05               | 0.05               |
| $\delta_{N0}$ | 2.4                | 2.4                | 2.4                | 2.4                | 2.4                | 2.4                |
| $m_1$         | $10^{-4}$          | $10^{-4}$          | $10^{-6}$          | $10^{-6}$          | $10^{-6}$          | $10^{-6}$          |
| $\theta_{S1}$ | $1.96 \times 10^4$ | $1.96 \times 10^4$ | $1.96 \times 10^4$ | $1.96 \times 10^4$ | $3.92 \times 10^4$ | $3.92 \times 10^4$ |
| $\delta_{S1}$ | 0.05               | 0.95               | 0.025              | 0.025              | 0.05               | 0.95               |
| $\delta_{N1}$ | 2.4                | 2.4                | 1.2                | 1.2                | 2.4                | 2.4                |
| $m_2$         | $10^{-4}$          | $10^{-4}$          | $10^{-4}$          | $10^{-4}$          | $10^{-6}$          | $10^{-6}$          |
| $\theta_{S2}$ | $3.92 \times 10^4$ | $3.92 \times 10^4$ | $1.96 \times 10^4$ | $1.96 \times 10^4$ | $3.92 \times 10^4$ | $3.92 \times 10^4$ |
| $\delta_{S2}$ | 0.05               | 0.95               | 0.025              | 0.025              | 0.025              | 0.025              |
| $\delta_{N2}$ | 2.4                | 2.4                | 2.4                | 2.4                | 1.2                | 1.2                |
| $\theta_{S3}$ | $3.92 \times 10^4$ | $3.92 \times 10^4$ | $3.92 \times 10^4$ | $3.92 \times 10^4$ | $3.92 \times 10^4$ | $3.92 \times 10^4$ |
| $\delta_{S3}$ | 0.025              | 0.025              | 0.025              | 0.025              | 0.025              | 0.025              |
| $\delta_{N3}$ | 1.2                | 1.2                | 1.2                | 1.2                | 1.2                | 1.2                |

AM = Advantageous Mutations, LM = Lethal Mutations
